# Supplementary material for: Enzymatic bulk synthesis, characterization, rheology, and biodegradability of biobased 2,5-bis(hydroxymethyl)furan polyesters
Source: Royal Society of Chemistry journal article supplement (doi:10.1039/d4gc01512f), 2024-01-01
Supplement: d4gc01512f1.pdf [file d4gc01512f1.pdf]

### Supplementary Information

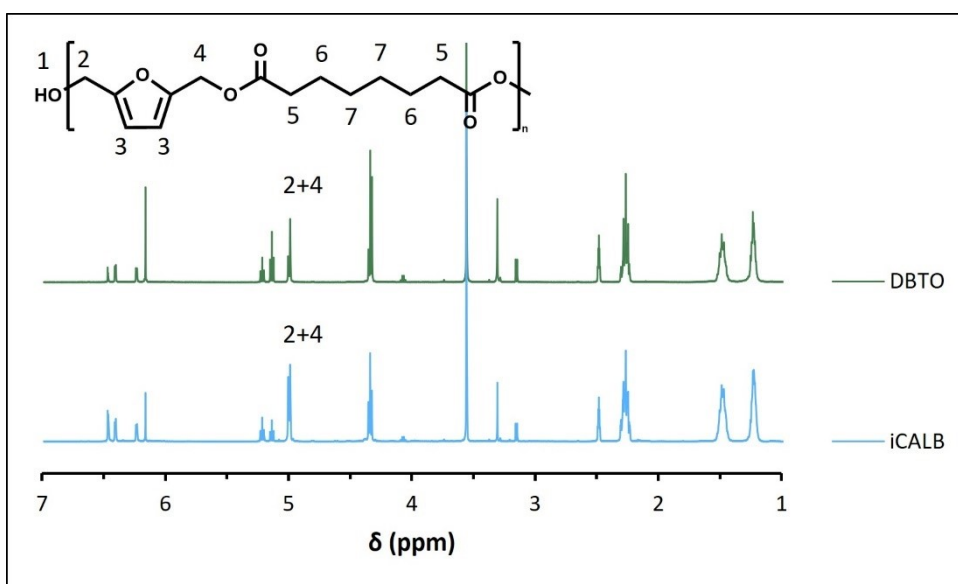

Figure 1S: Normalized  $^1\text{H-NMR}$  spectra of the polymerization of BHMf and dimethyl suberate by using either *i*CALB or DBTO as catalyst after 26 h.

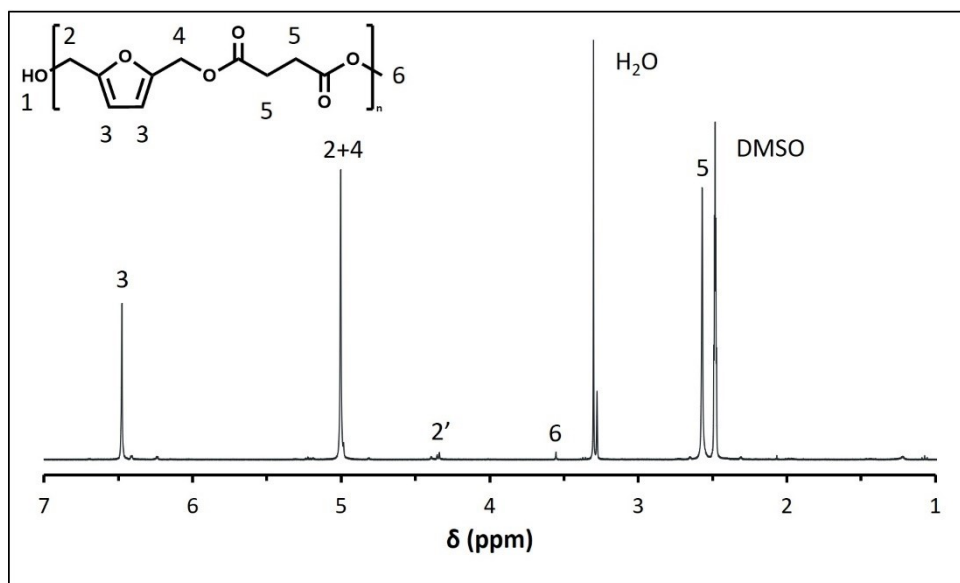

Figure 2S:  $^1\text{H-NMR}$  spectrum of poly(2,5-furandimethylene succinate) (PFSuc).

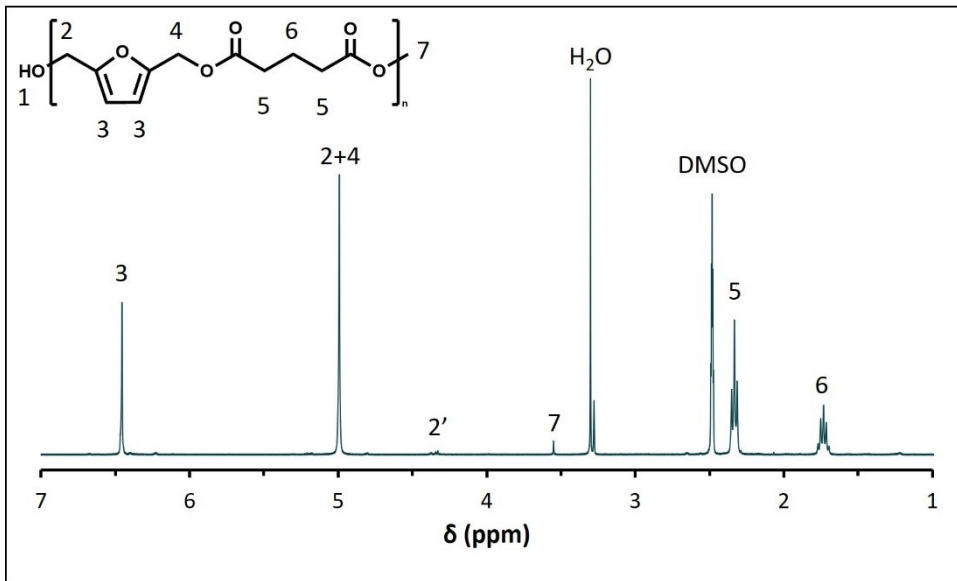

Figure 3S: <sup>1</sup>H-NMR spectrum of poly(2,5-furandimethylene glutarate) (PFGlu).

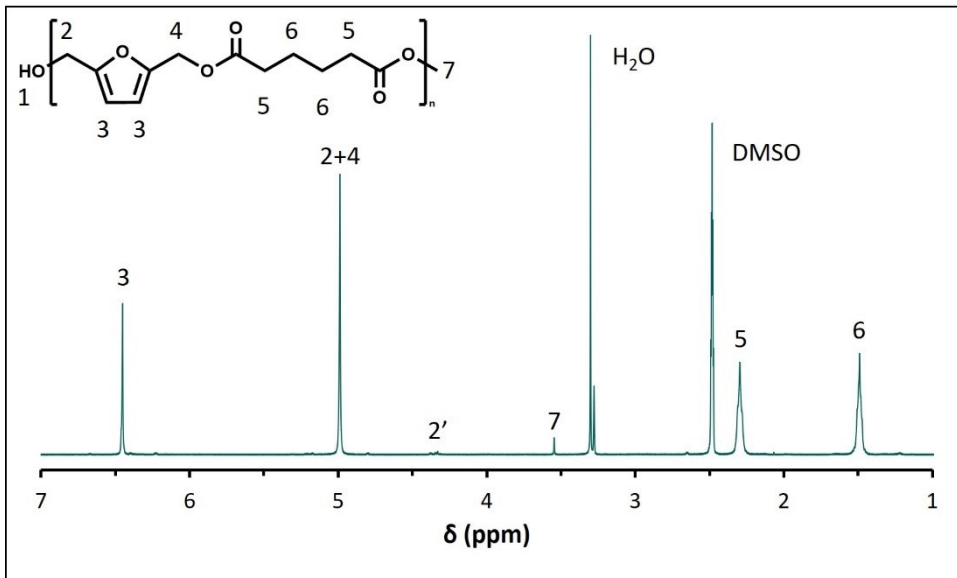

Figure 4S: <sup>1</sup>H-NMR spectrum of poly(2,5-furandimethylene adipate) (PFAd).

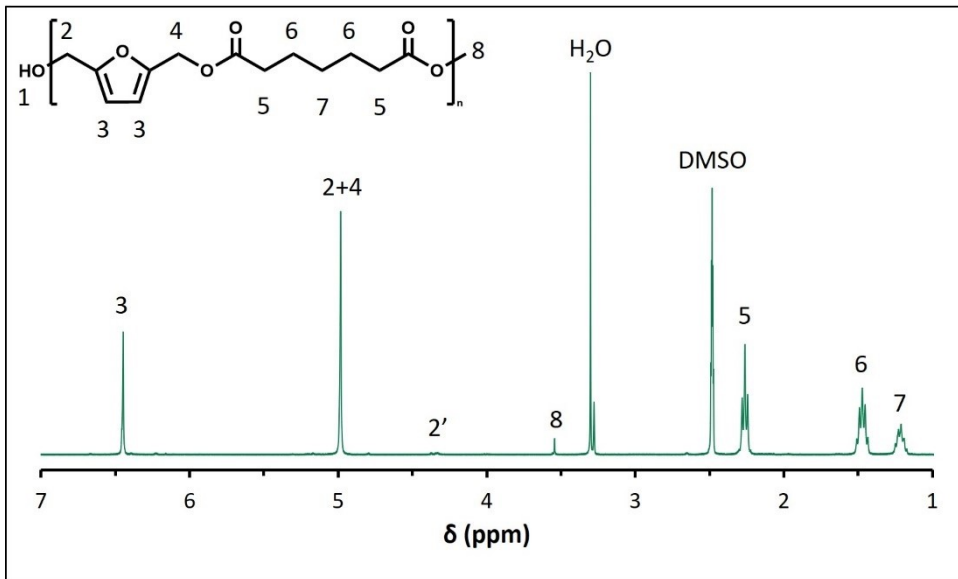

Figure 5S: <sup>1</sup>H-NMR spectrum of poly(2,5-furandimethylene pimelate) (PFpim).

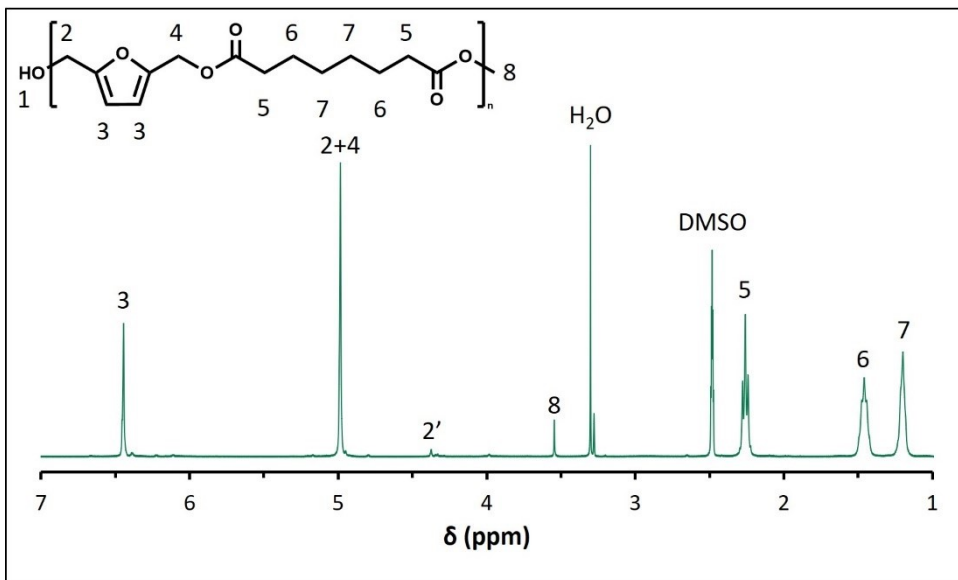

Figure 6S: <sup>1</sup>H-NMR spectrum of poly(2,5-furandimethylene suberate) (PFSub).

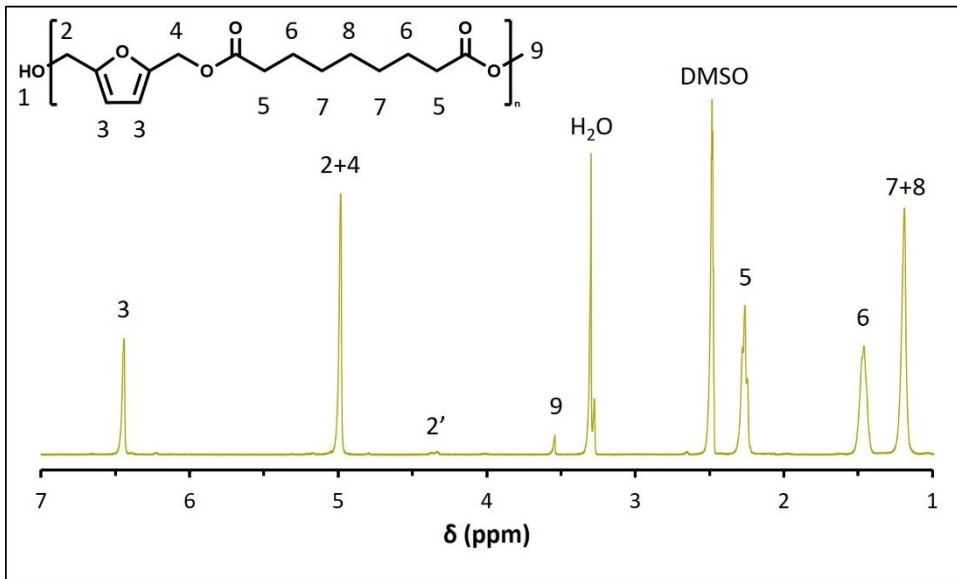

Figure 7S: <sup>1</sup>H-NMR spectrum of poly(2,5-furandimethylene azelate) (PFAze).

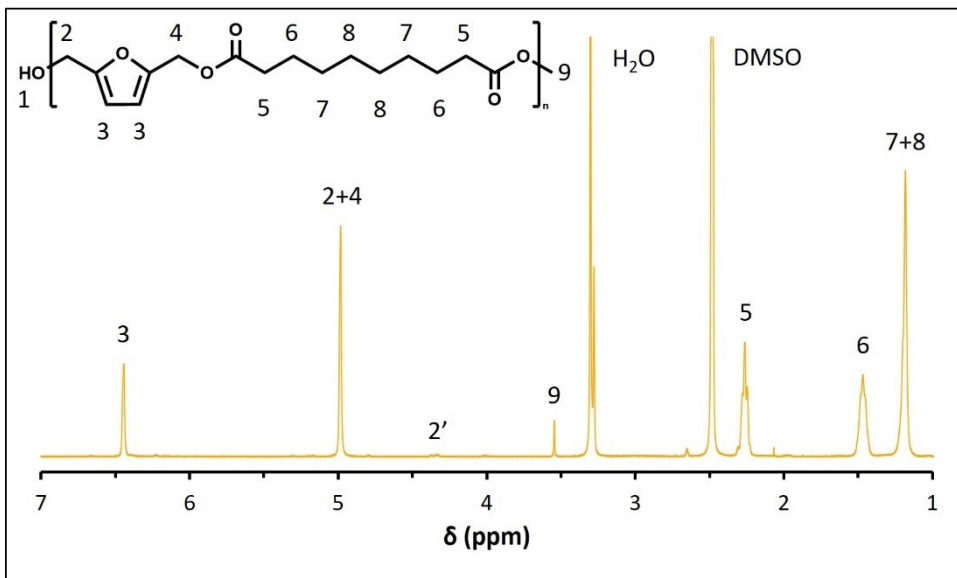

Figure 8S: <sup>1</sup>H-NMR spectrum of poly(2,5-furandimethylene Sebacate) (PFSeb).

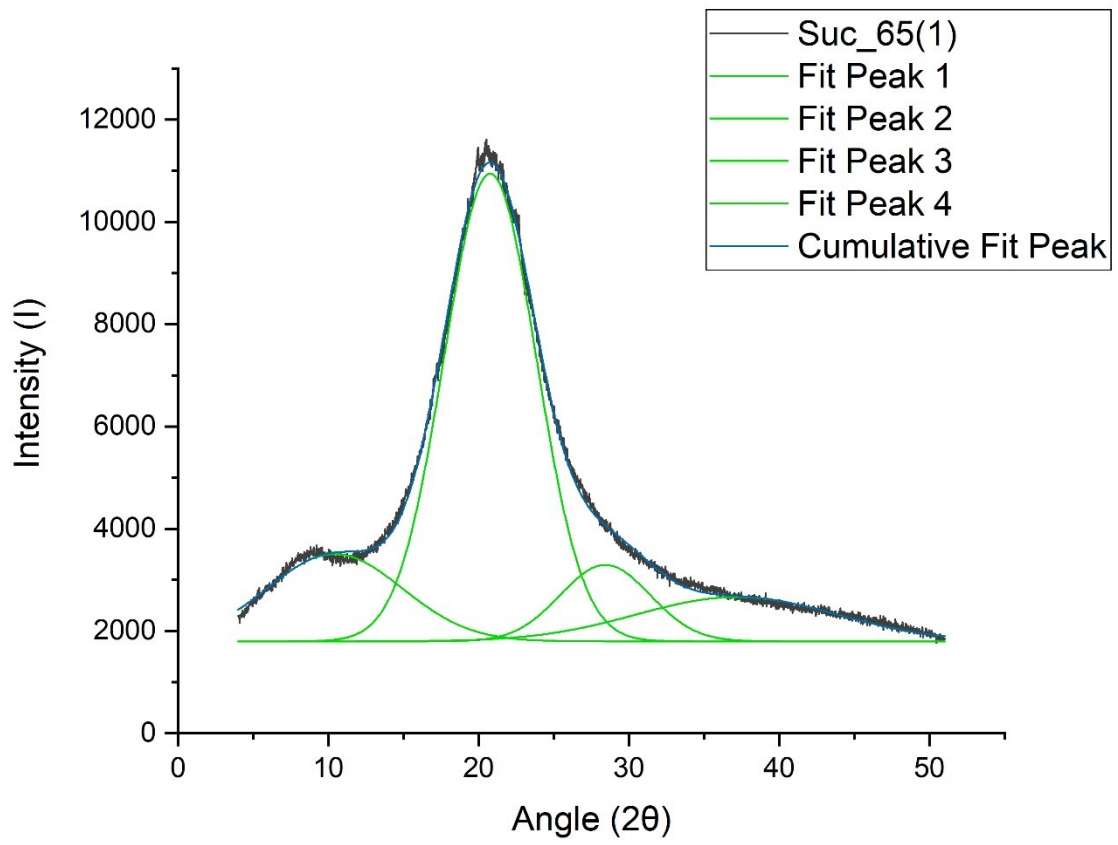

Figure 9S: WAXD Spectrum of poly(2,5-furandimethylene succinate) (PFSuc). The amorphous parts are represented by the green curves.

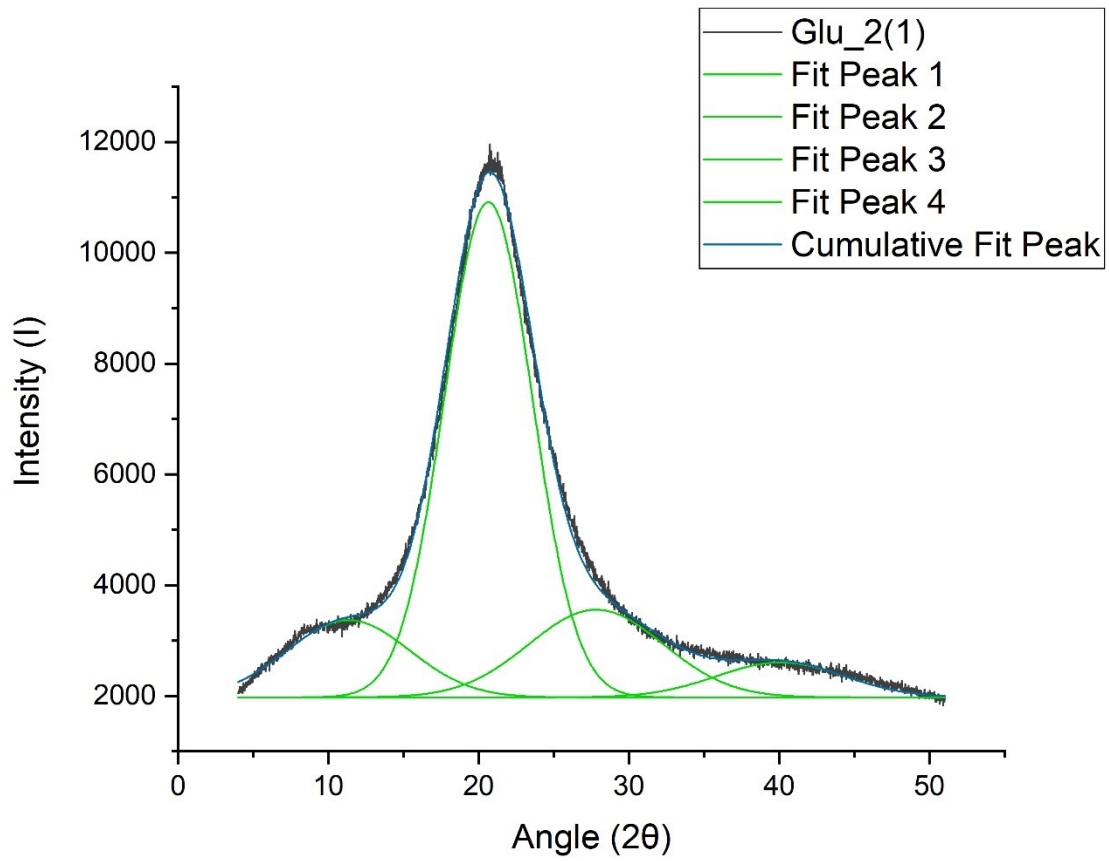

Figure 10S: WAXD Spectrum of poly(2,5-furandimethylene glutarate) (PFGlu). The amorphous parts are represented by the green curves.

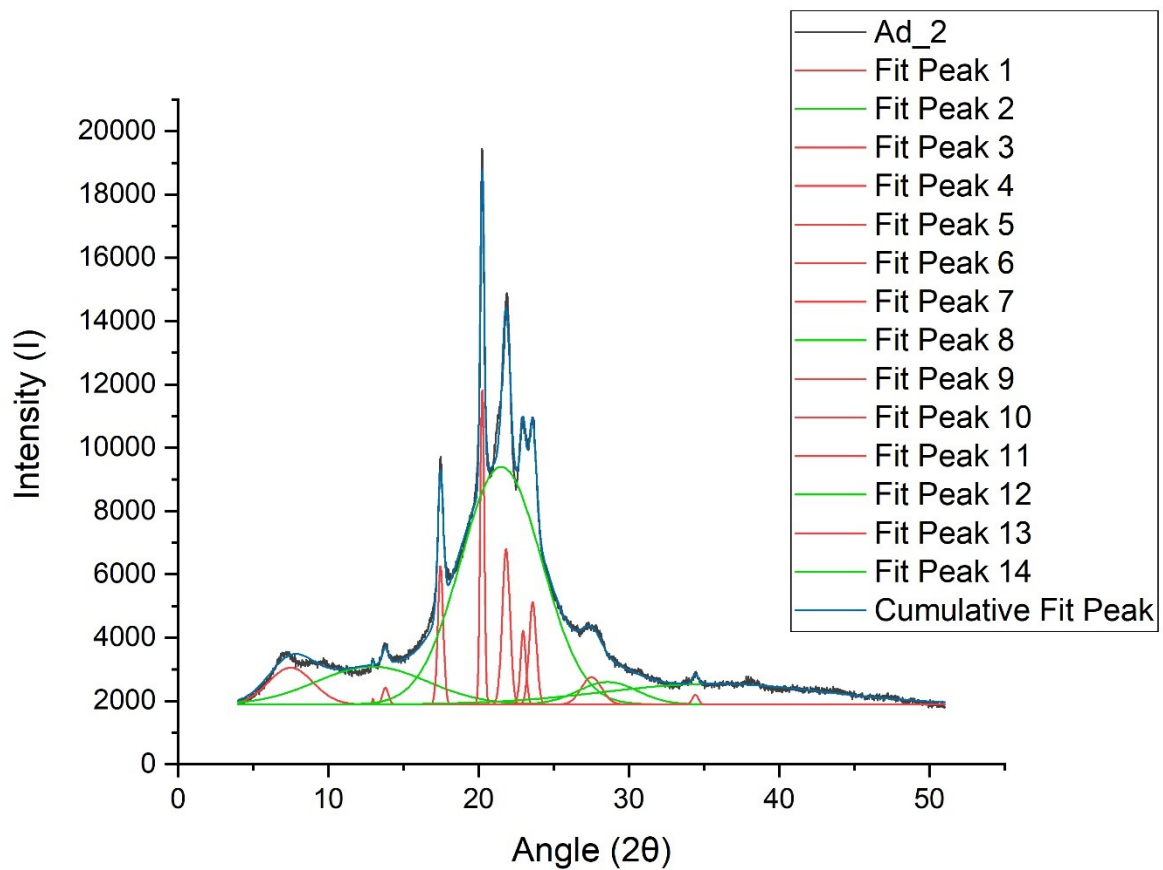

Figure 11S: WAXD Spectrum of poly(2,5-furandimethylene adipate) (PFAd). The amorphous parts are represented by the green curves, the crystalline parts are represented by the sharp red peaks.

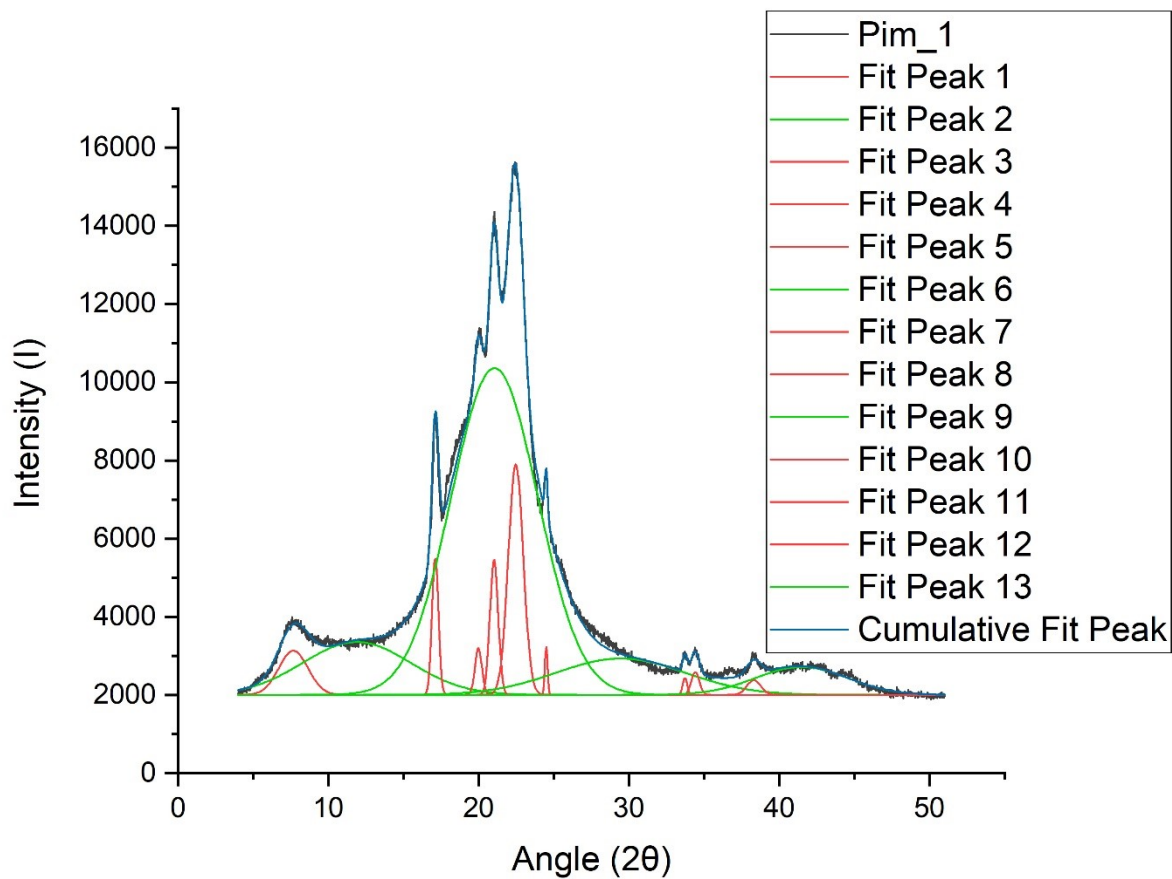

Figure 12S: WAXD Spectrum of poly(2,5-furandimethylene pimelate) (PFPim). The amorphous parts are represented by the green curves, the crystalline parts are represented by the sharp red peaks.



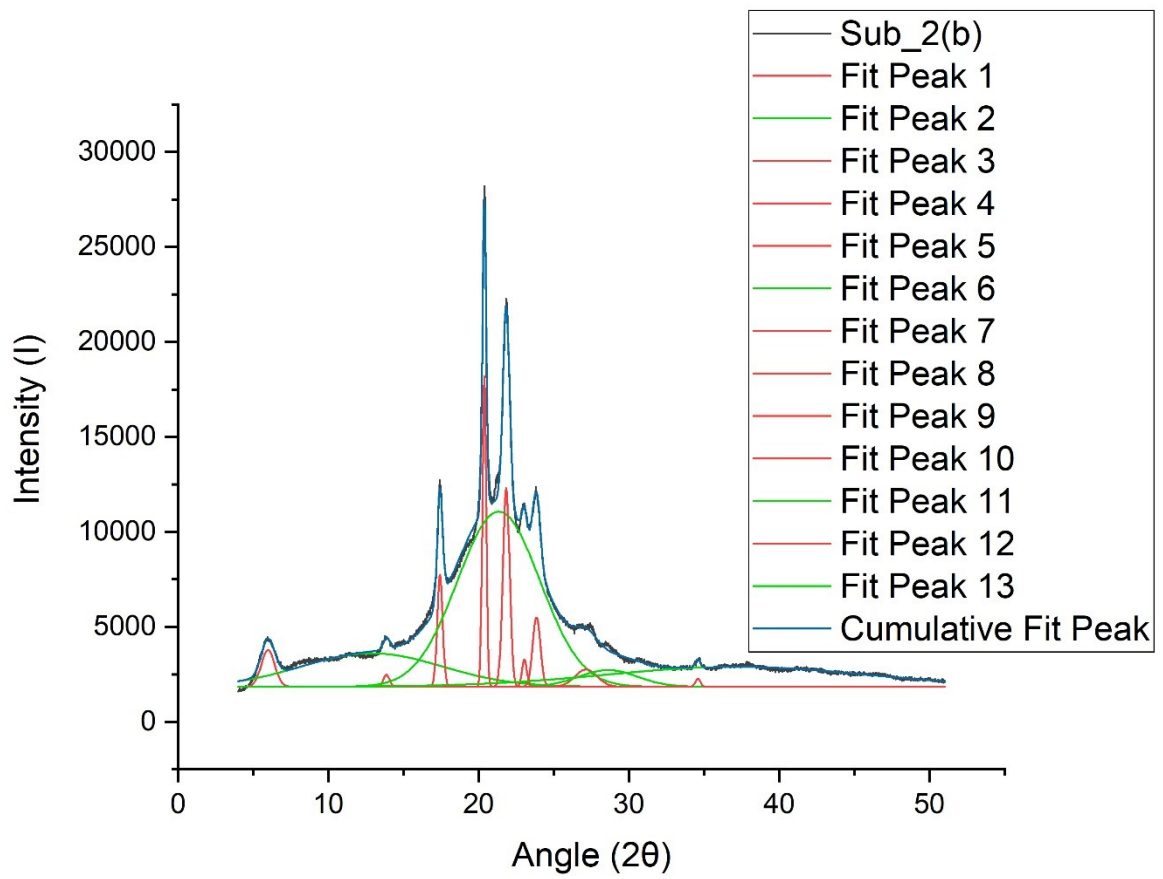

Figure 13S: WAXD Spectrum of poly(2,5-furandimethylene suberate) (PFSub). The amorphous parts are represented by the green curves, the crystalline parts are represented by the sharp red peaks.

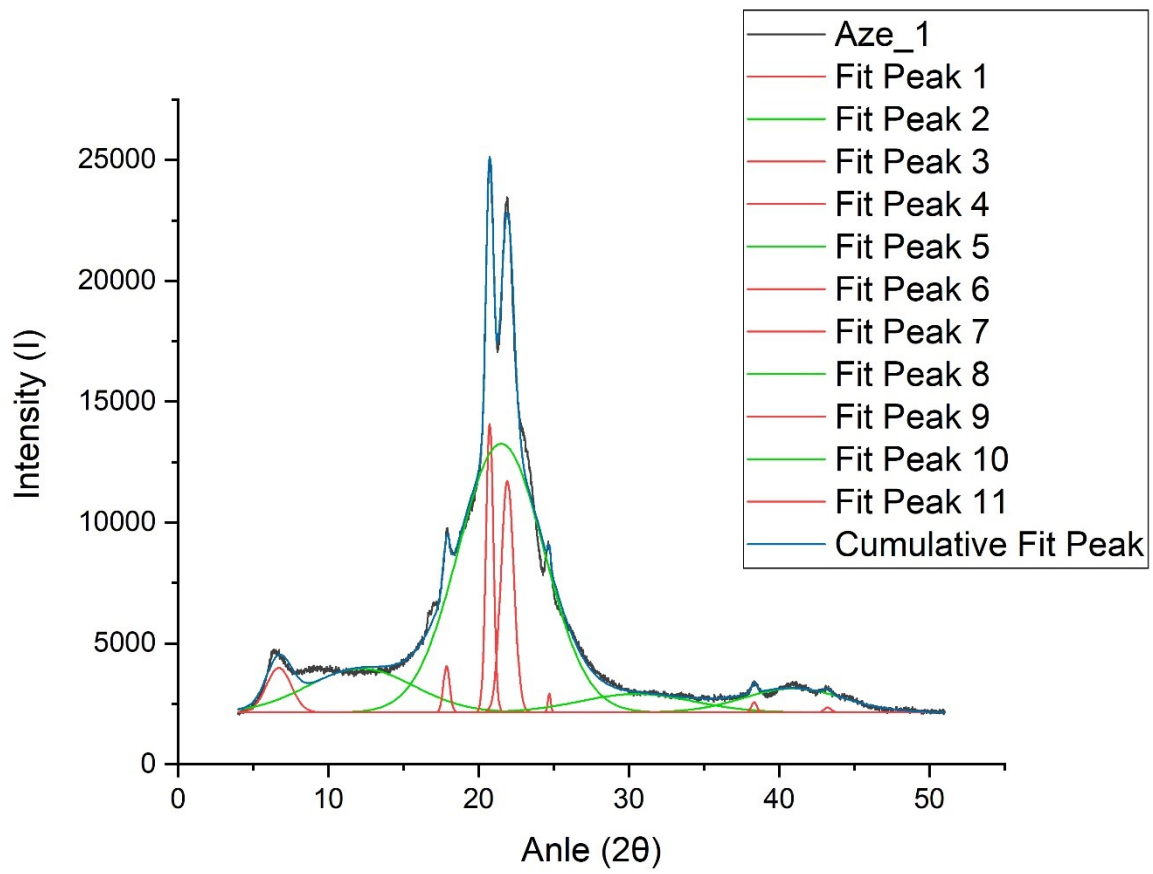

Figure 14S: WAXD Spectrum of poly(2,5-furandimethylene azelate) (PFAze). The amorphous parts are represented by the green curves, the crystalline parts are represented by the sharp red peaks.

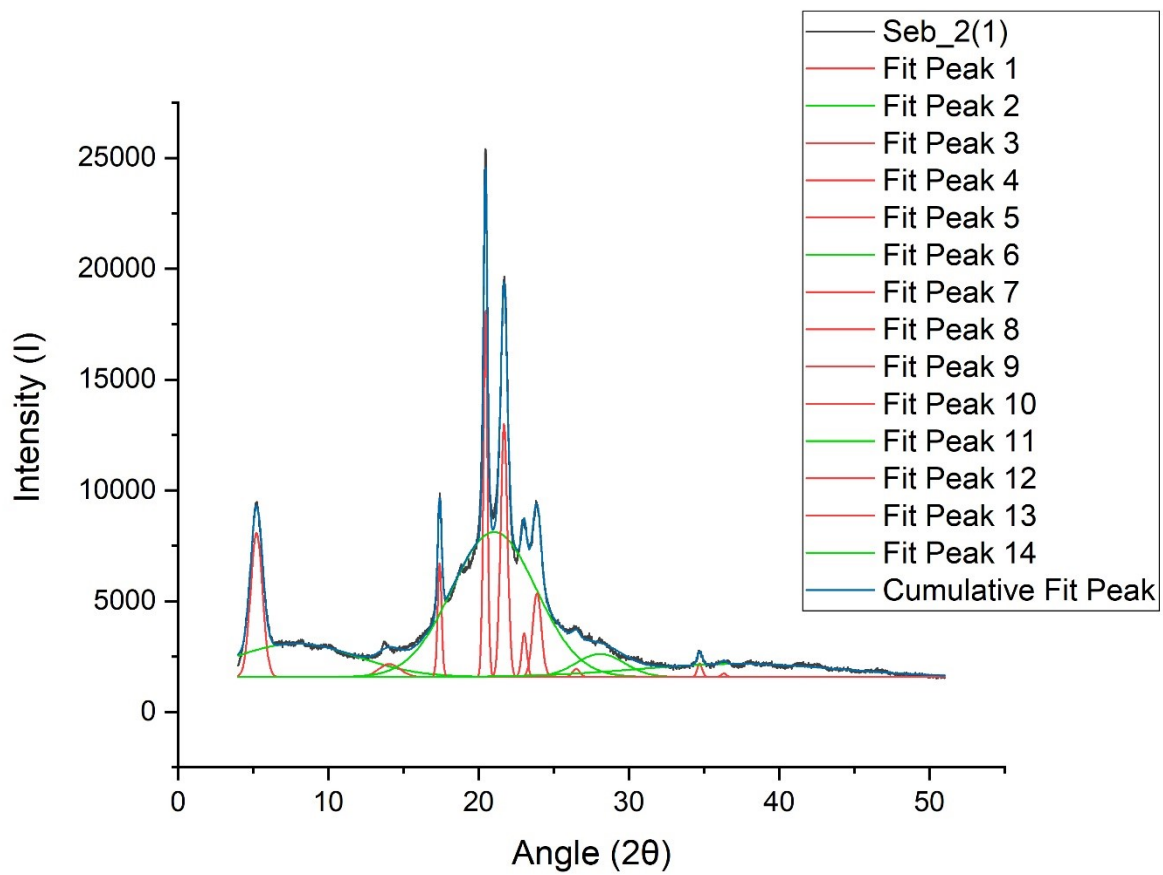

Figure 15S: WAXD Spectrum of poly(2,5-furandimethylene Sebacate) (PFSeb). The amorphous parts are represented by the green curves, the crystalline parts are represented by the sharp red peaks.
